# Supplementary material for: N6-methyladenosine modification of the Aedes aegypti transcriptome and its alteration upon dengue virus infection in Aag2 cell line
Source: PubMed Central journal article supplement (PMC9209429; doi:10.1038/s42003-022-03566-8), 2022-06-20
Supplement: 42003_2022_3566_MOESM1_ESM.pdf [file 42003_2022_3566_MOESM1_ESM.pdf]

# N<sup>6</sup>-methyladenosine modification of the *Aedes aegypti* transcriptome and its alteration upon dengue virus infection in Aag2 cell line

Zhenkai Dai, Kayvan Etebari and Sassan Asgari\*

## Supplementary information

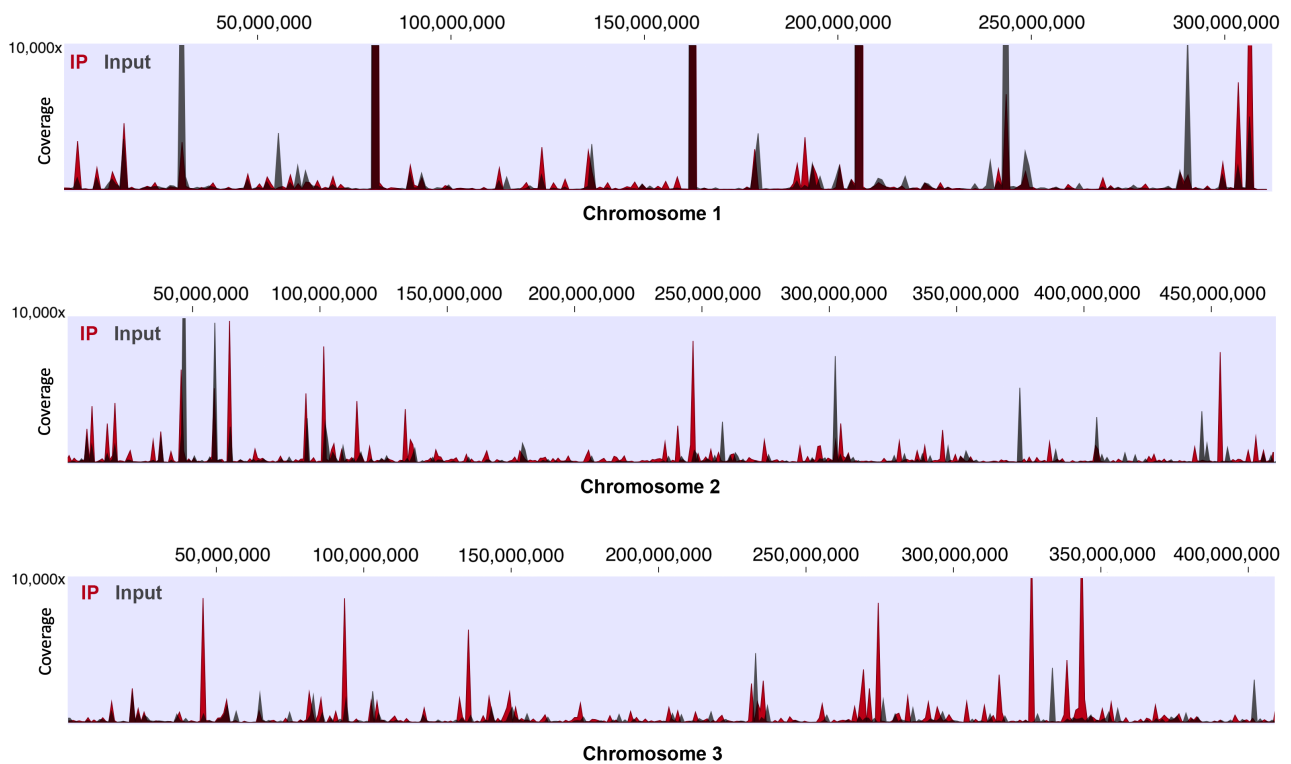

**Supplementary Fig. 1:** The reads distribution patterns from Input and IP groups at the *Aedes aegypti* chromosomal level. The read density chart determined by mapping MeRIP-Seq data of RNA isolated from Aag2 cells against AegL5.0 genome reference.

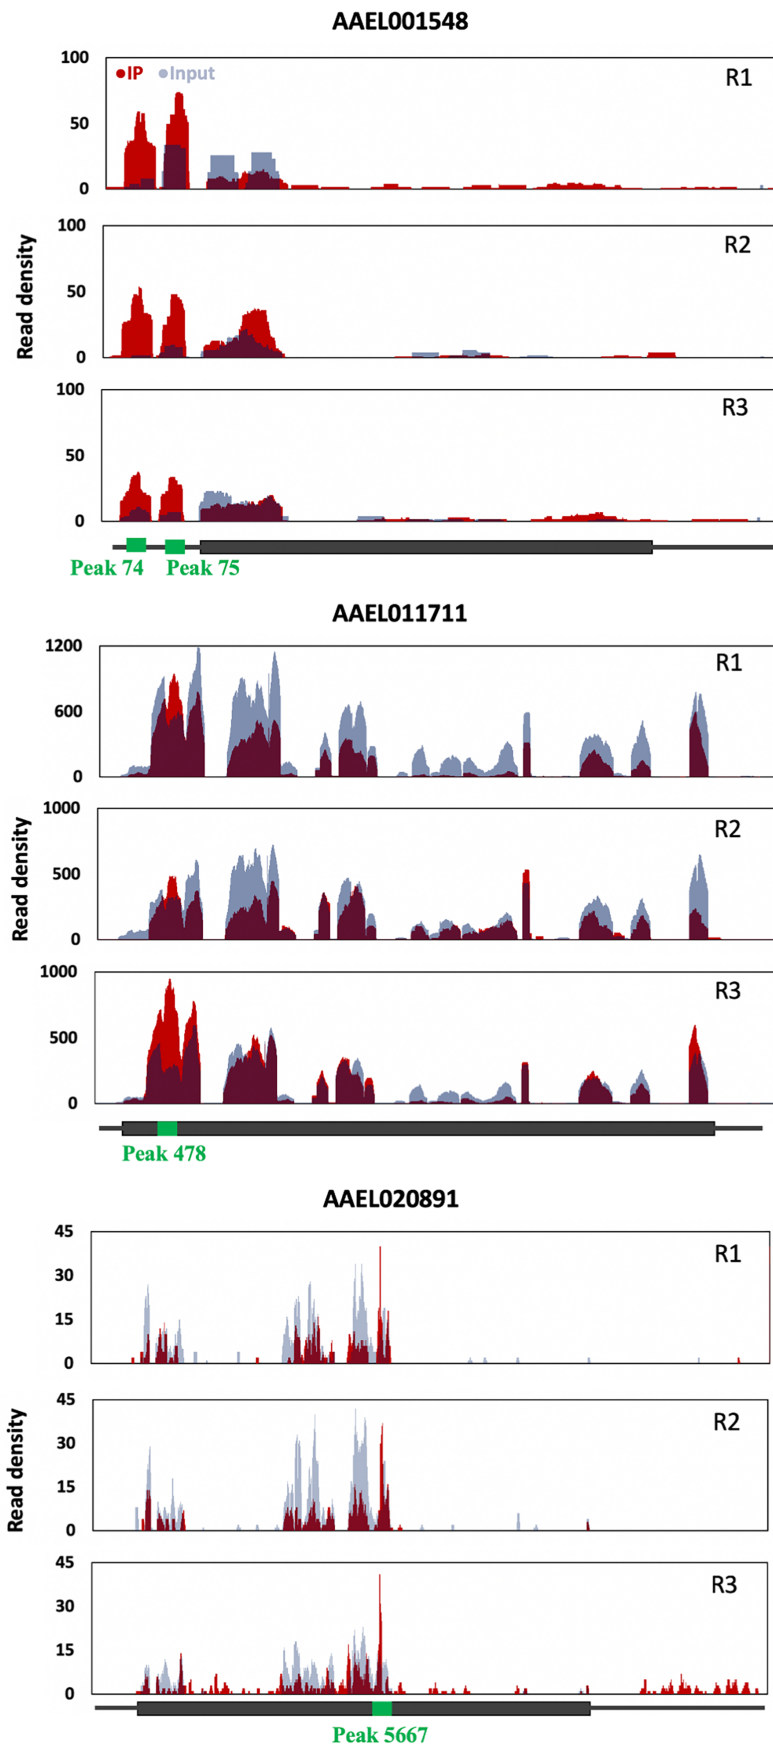

**Supplementary Fig. 2:** Distribution of m<sup>6</sup>A peaks in Input and IP groups in three replicates for three representative *Aedes aegypti* genes with identified m<sup>6</sup>A peaks determined by MeRIP-Seq of RNA isolated from Aag2 cells.

## Biological Process

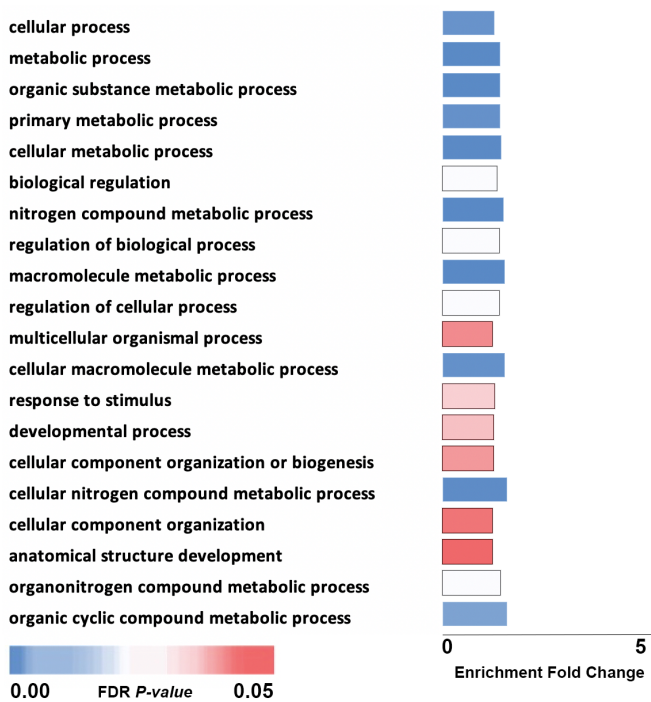

## Molecular Function

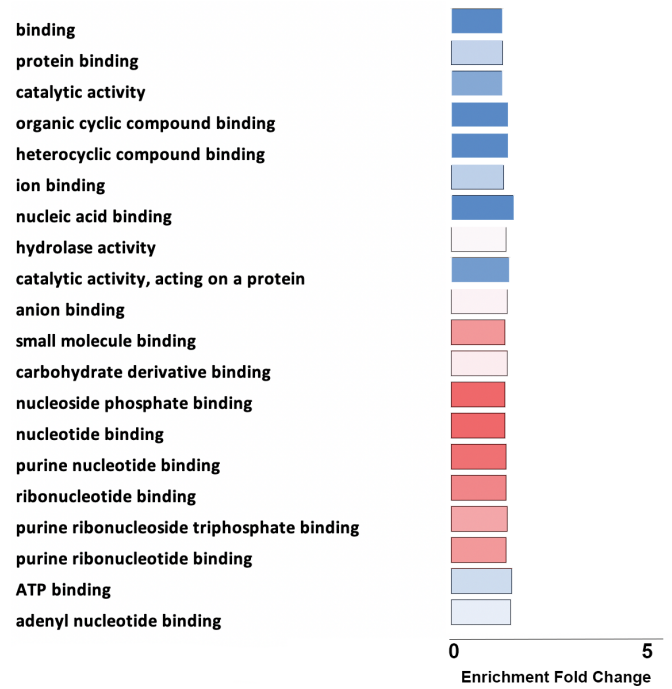

## Cellular component

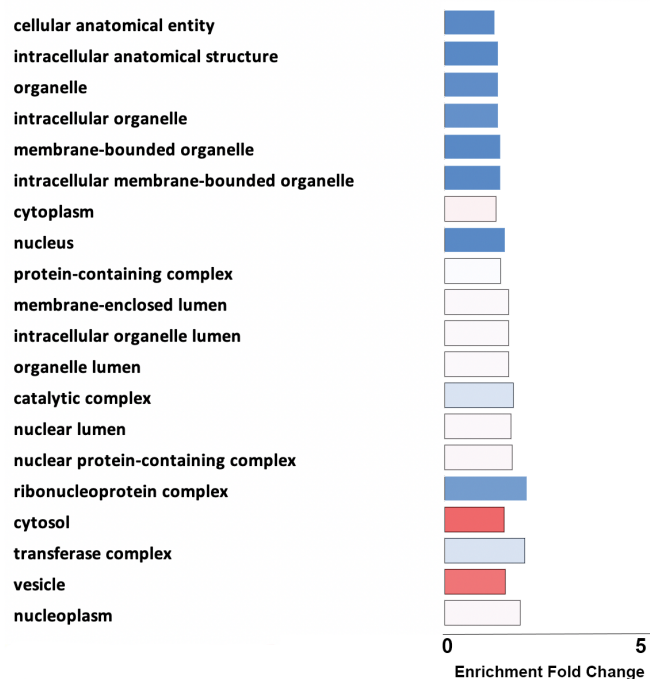

**Supplementary Fig. 3: Gene ontology term enrichment analysis of *Ae. aegypti* transcripts with m<sup>6</sup>A modification.** Genes were classified into three categories of biological process, molecular function, and cellular component.

**a**

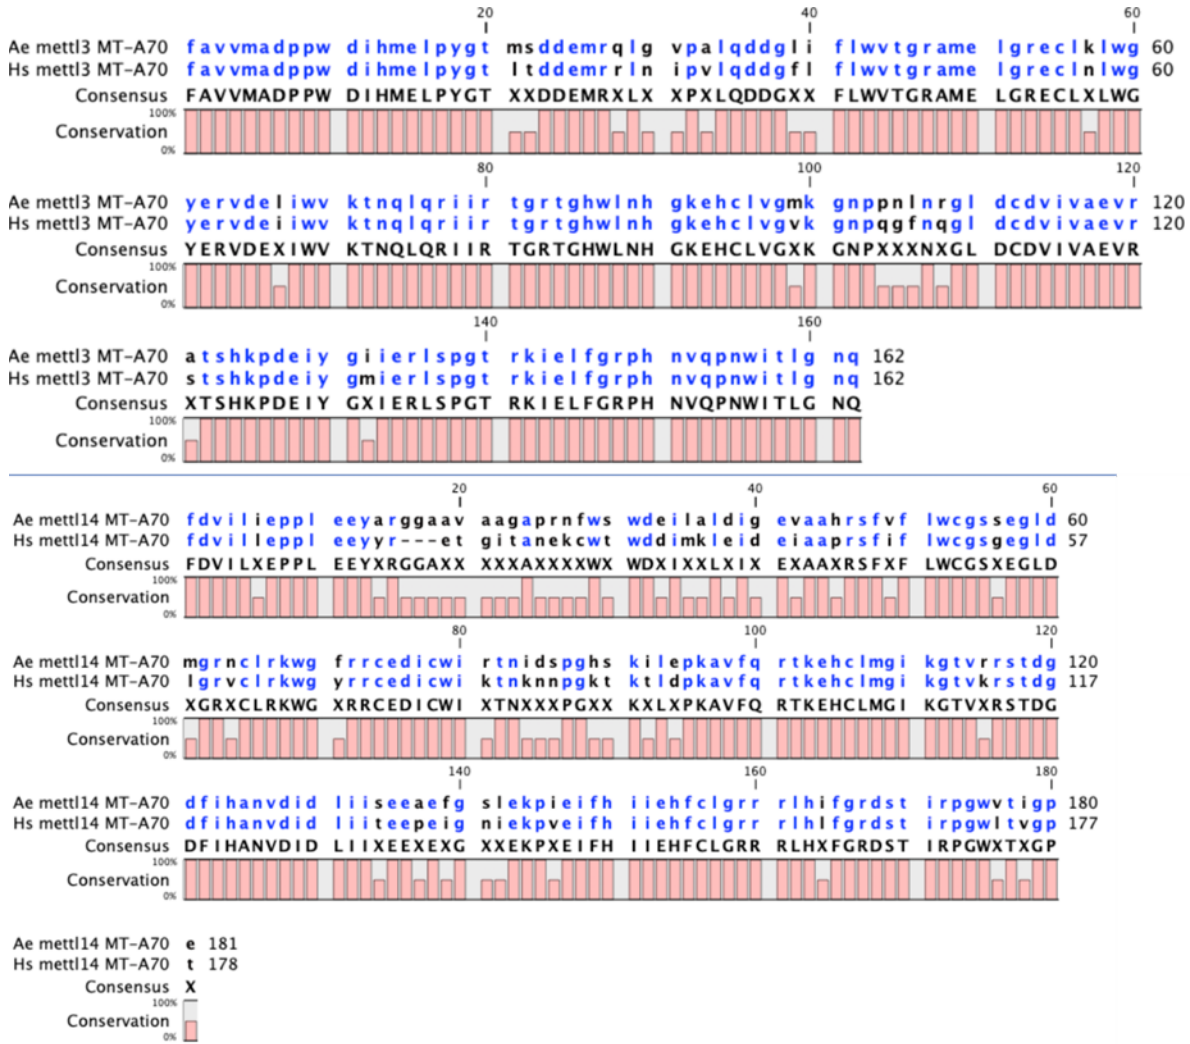

**b**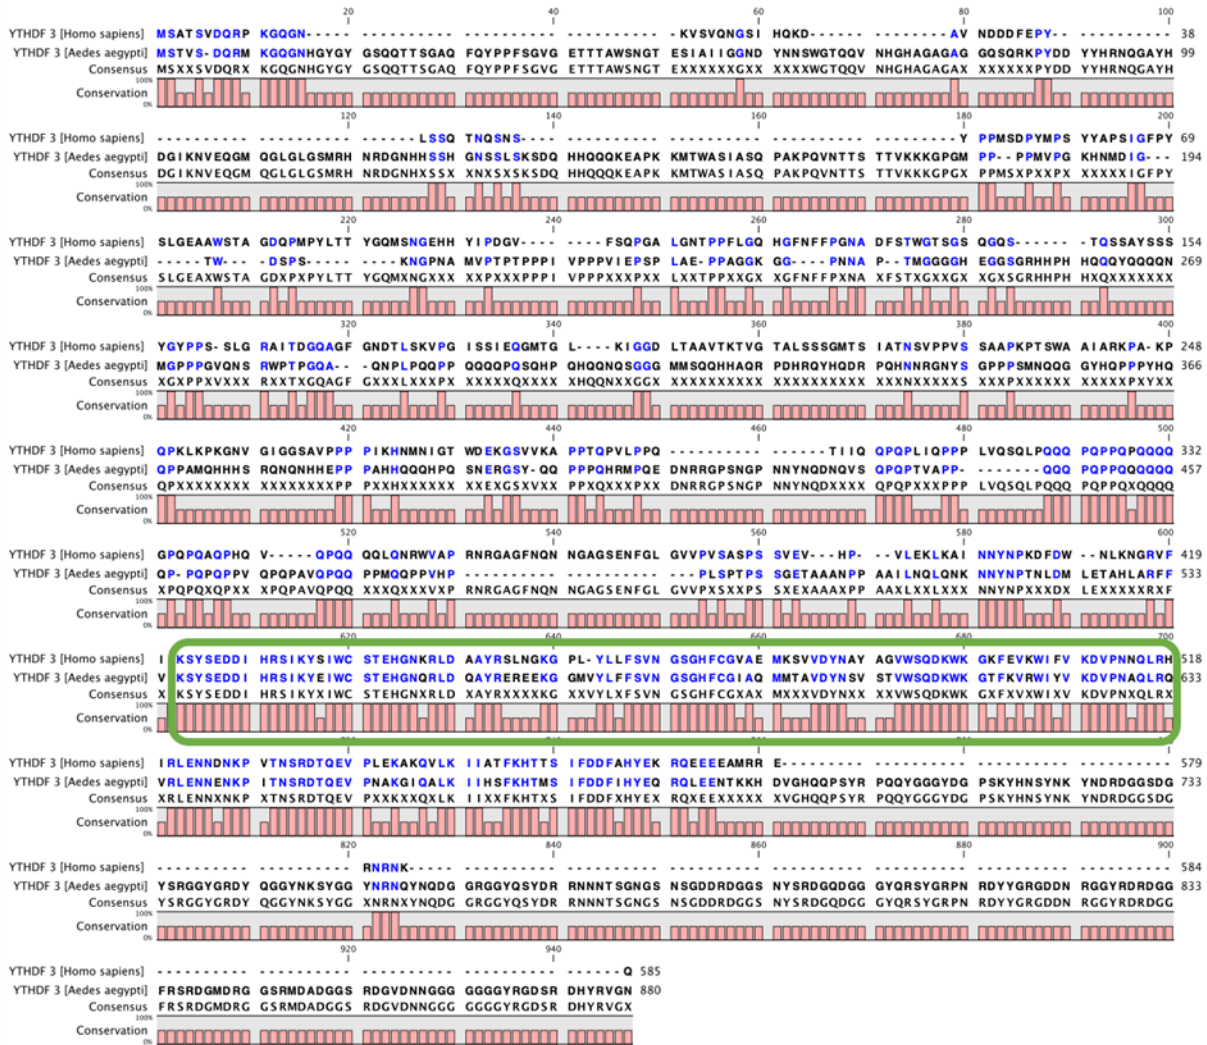

**Supplementary Fig. 4. Sequence alignment of three m<sup>6</sup>A related protein.** **a** Amino acid sequence alignment of the MTA-70 domain of METTL3 and METTL14 proteins from *Homo sapiens* (Hs) and *Ae. aegypti* (Ae). **b** Amino acid sequence alignment of the entire YTHDF3 protein from *H. sapiens* and *Ae. aegypti*. The YTH domain is indicated by a green rectangle. All the alignments were generated using Clustal W algorithm of CLC Genomics Workbench software.

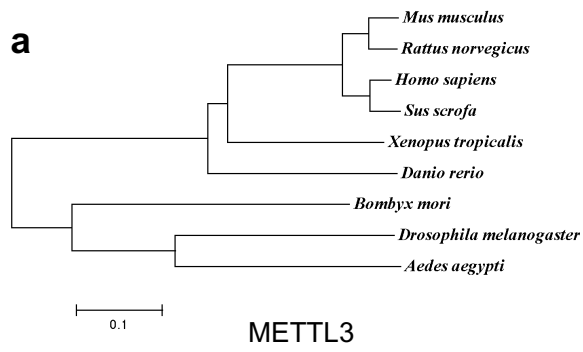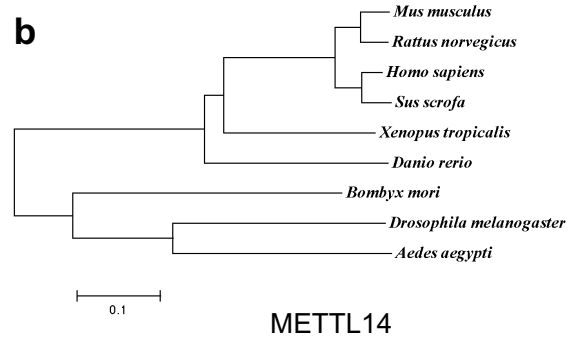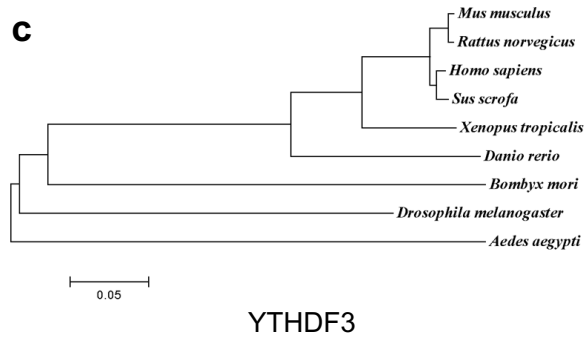

**Supplementary Fig. 5. Phylogenetic trees of m<sup>6</sup>A-modification-related genes. (a) METTL3, (b) METTL14, and (c) YTHDF3.**

**Supplementary Table 1.** DENV-2 m<sup>6</sup>A peaks and their positions in the virus genome.

|        | Start | End  | Length | Coding region |
|--------|-------|------|--------|---------------|
| Peak 1 | 540   | 789  | 249    | pM            |
| Peak 2 | 3460  | 3766 | 306    | NS1-NS2A      |
| Peak 3 | 7121  | 7868 | 747    | NS4B-NS5      |
| Peak 4 | 8778  | 8933 | 155    | NS5           |
| Peak 5 | 8957  | 9117 | 160    | NS5           |

**Supplementary Table 2.** Primers used in this study.

| qPCR Primers | Gene names                                      | Primer sequences      |
|--------------|-------------------------------------------------|-----------------------|
| AAEL026586F  | uncharacterized protein LOC110676643 isoform X1 | GGTAGAGGACGAGCGAATGG  |
| AAEL026586R  |                                                 | ACCGGTTACTTCCGCATTGT  |
| AAEL011112F  | sorbitol dehydrogenase-like                     | CGGTGACTTCGTGGTTCAGA  |
| AAEL011112R  |                                                 | CAAAAGTCGCAAACCTCGGCA |
| AAEL020023F  | histone H2B-like                                | GGAAAGGCCCGGAAGAAATC  |
| AAEL020023R  |                                                 | CCAGTGTCGGGATGGACTTG  |
| AAEL025779F  | SUMO-conjugating enzyme UBC9-B                  | CCACTGTTCCACCCGAATGT  |
| AAEL025779R  |                                                 | CAGCAGATCCTGAATGCCGA  |
| MEETL3F      | METTL3                                          | ACATGGAGCTTCCTTACGGA  |
| MEETL3R      |                                                 | GGCCAGTAACCCAAAGGAAT  |
| METTL14F     | METTL14                                         | CTACGGACGGAGATTTTCATC |
| METTL14R     |                                                 | ACGTCTTCCCAAGCAGAAAT  |
| YTHDF-qF     | YTHDF                                           | GCAACAAGTGAACCACGGTC  |
| YTHDF-qR     |                                                 | CCCTGCATTCTTGCTCAAC   |
| DENV-qF      | DENV-2 NS1                                      | GGTATGGTGGGCGCTACTA   |
| DENV-qR      |                                                 | CAAGGCTAACGCATCAGTCA  |
| RPS17-qF     | Ribosomal protein subunit 17                    | CACTCCGAGGTCCGTGGTAT  |
| RPS17-qR     |                                                 | GGACACTTCGGGCACGTAGT  |

| RNAi primers    | Primer sequences                              |
|-----------------|-----------------------------------------------|
| AAEL026586RNAiF | TAATACGACTCACTATAGGGAGTAAGAAGCCGACGAGTGCTG    |
| AAEL026586RNAiR | TAATACGACTCACTATAGGGAGCAGCATGCGGTCCATTTTCAG   |
| AAEL011112RNAiF | TAATACGACTCACTATAGGGAGCGGTCCGATTGGATTGGTGA    |
| AAEL011112RNAiR | TAATACGACTCACTATAGGGAGCGTCGATTTTTTCCACTCGCC   |
| AAEL020023RNAiF | TAATACGACTCACTATAGGGAGCTGGCGTTTCTTCAAAGGCT    |
| AAEL020023RNAiR | TAATACGACTCACTATAGGGAGTTCGCGGGAAGTGATTGTCG    |
| AAEL025779RNAiF | TAATACGACTCACTATAGGGAGGCGTGCTAATCGGGGTAGTT    |
| AAEL025779RNAiR | TAATACGACTCACTATAGGGAGAGGCGAGTTGGTTGTGAGAA    |
| MEETL3_RNAi-F   | TAATACGACTCACTATAGGGAGAAAAGCAAGATTCTCCTCACGGC |
| MEETL3_RNAi-R   | TAATACGACTCACTATAGGGAGTTGGCTTCGTCAGCAGTTCCAGA |
| METTL14_RNAi-F  | TAATACGACTCACTATAGGGAGCTACGTGAAAAGTCGCAGAAGCG |
| METTL14_RNAi-R  | TAATACGACTCACTATAGGGAGGAGCGGCCACTTCACCAATATC  |

Sequences in red represent the T7 promoter sequences.
