# Supplementary material for: N6-methyladenosine modification of the Aedes aegypti transcriptome and its alteration upon dengue virus infection in Aag2 cell line
Source: PubMed Central journal article supplement (PMC9209429; doi:10.1038/s42003-022-03566-8), 2022-06-20
Supplement: 42003_2022_3566_MOESM7_ESM.pdf [file 42003_2022_3566_MOESM7_ESM.pdf]

## Description of Additional Supplementary Files

**File name:** Supplementary Data 1

**Description:** m6A peaks identified in *Aedes aegypti* through MeRIP-Seq analysis

**File name:** Supplementary Data 2

**Description:** Gene Ontology enrichment of *Aedes aegypti* genes with m6A peaks

**File name:** Supplementary Data 3

**Description:** Differentially expressed m6A peaks due to dengue virus infection

**File name:** Supplementary Data 4

**Description:** Differentially expressed genes due to dengue virus infection
